# Supplementary material
Source: Springer Nature journal article supplement (https://www.springermedizin.de/resource/supplementary/12967_2011_779_MOESM13_ESM.pdf/9577050)

**A**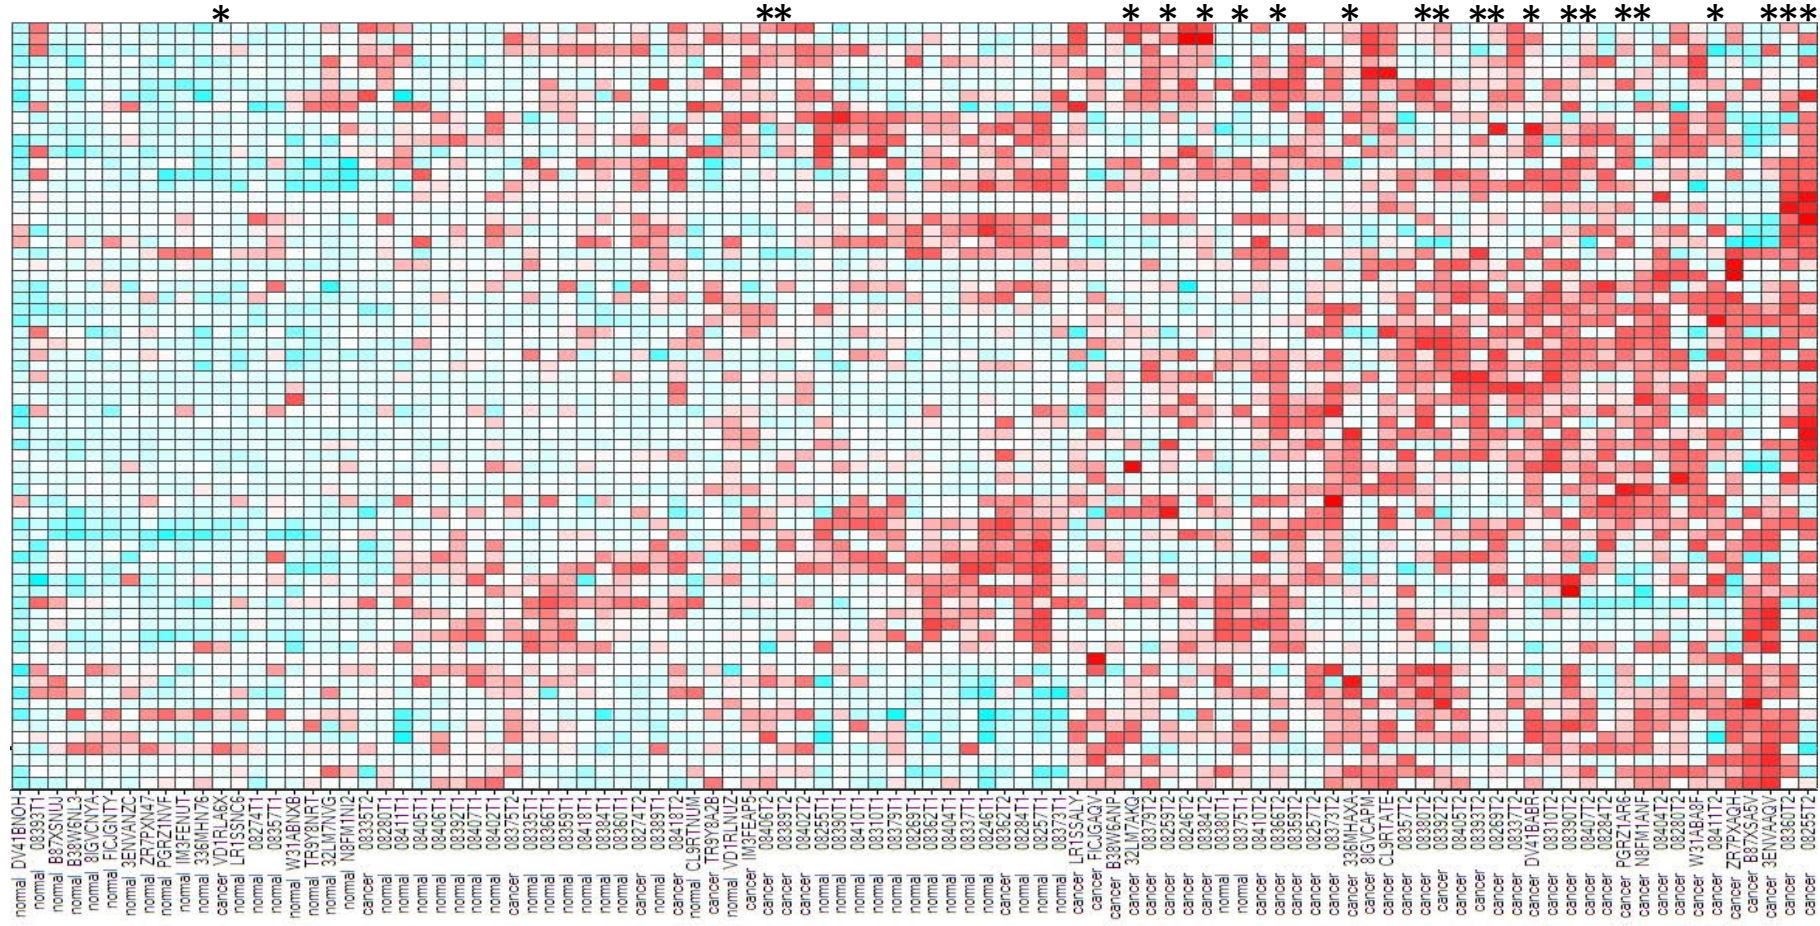**B**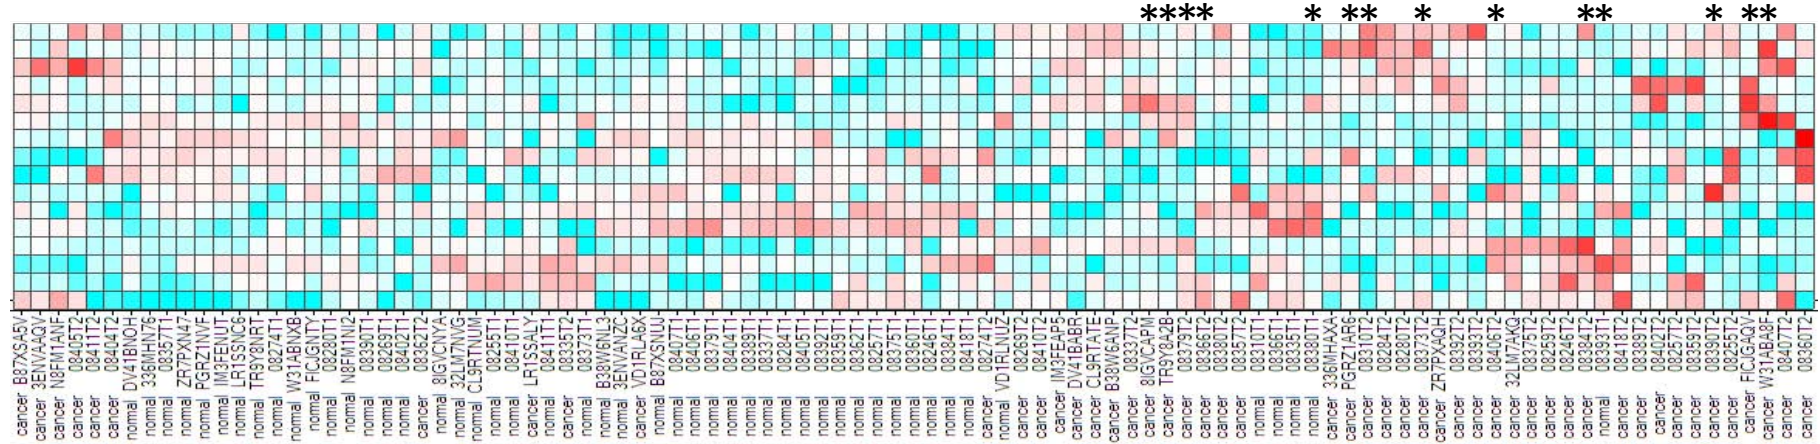

Supplement: MOESM13 [file 9577050]
